# Supplementary material for: Tunable near-infrared phosphor LiSc2SbO6:Cr3+ by Mg2+ substitution and Yb3+ co-doping for phosphor-converted light-emitting diodes
Source: Royal Society of Chemistry journal article supplement (doi:10.1039/d4tc03112a), 2024-01-01
Supplement: d4tc03112a1.pdf [file d4tc03112a1.pdf]

# **Tunable near-infrared phosphor $\text{LiSc}_2\text{SbO}_6:\text{Cr}^{3+}$ by $\text{Mg}^{2+}$ substitution and $\text{Yb}^{3+}$ co-doping for phosphor-converted light- emitting diodes**

Xu Yang<sup>a</sup>, Zihao Ren<sup>a</sup>, Tao Yin<sup>a</sup>, Jialong Yu<sup>a</sup>, Xinying Song<sup>a</sup>, Yuansheng Ma<sup>a</sup>, Xu Li<sup>a,b</sup>, Li Guan<sup>a,c\*</sup>, Yingnan Guo<sup>a,\*</sup>, Fenghe Wang<sup>a,c\*</sup>

<sup>a</sup>. College of Physics Science and Technology, Hebei University, Baoding 071002, P. R. China.

<sup>b</sup>. Key Laboratory of High-precision Computation and Application of Quantum Field Theory of Hebei Province, Hebei University, Baoding 071002, China

<sup>c</sup>. Hebei Key Laboratory of Photo-Electricity Information and Materials, College of Physics Science and Technology, Hebei University, Baoding 071002, P R China

E-mail: fhwang@hbu.edu.cn; fenghe\_wang@hotmail.com.

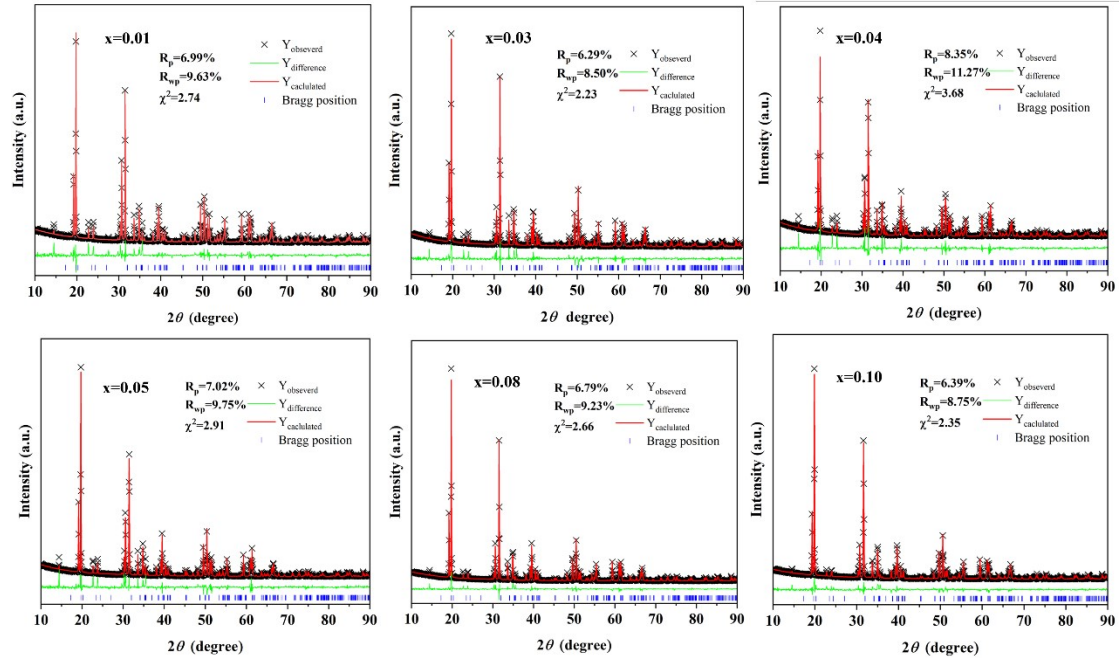

**Fig.S1.** XRD refinement of  $LiSc_2SbO_6:Cr^{3+}$  ( $x = 0.01 - 0.10$ )

**Table.S1.** Main parameters of processing and refinement results of  $LiSc_2SbO_6:Cr^{3+}$  ( $x=0-0.10$ )

| Compound            | x=0     | x=0.01  | x=0.02  | x=0.03  | x=0.04  | x=0.05  | x=0.08  | x=0.10  |
|---------------------|---------|---------|---------|---------|---------|---------|---------|---------|
| Space group         | Pmn21   |
| a, Å                | 8.71540 | 8.70350 | 8.70180 | 8.69635 | 8.68662 | 8.68376 | 8.67058 | 8.66202 |
| b, Å                | 5.07100 | 5.06346 | 5.06290 | 5.06022 | 5.05569 | 5.05519 | 5.04939 | 5.04556 |
| c, Å                | 5.25670 | 5.24439 | 5.24430 | 5.24211 | 5.23882 | 5.23869 | 5.23376 | 5.22992 |
| V, Å <sup>3</sup>   | 232.324 | 231.119 | 231.045 | 230.681 | 230.073 | 229.969 | 229.140 | 228.572 |
| α=β=γ, deg          | 90      | 90      | 90      | 90      | 90      | 90      | 90      | 90      |
| 2θ-interval,deg     | 10–120  | 10–120  | 10–120  | 10–120  | 10–120  | 10–120  | 10–120  | 10–120  |
| R <sub>wp</sub> , % |         | 9.63    | 9.59    | 8.50    | 11.27   | 9.75    | 9.23    | 8.75    |
| R <sub>p</sub> , %  |         | 6.99    | 7.19    | 6.29    | 8.35    | 7.02    | 6.79    | 6.39    |
| χ <sup>2</sup>      |         | 2.74    | 2.15    | 2.23    | 3.68    | 2.91    | 2.66    | 2.35    |

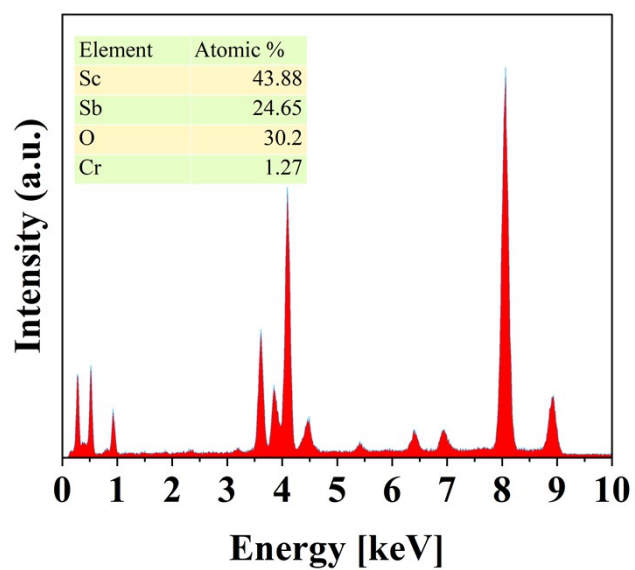

Fig.S2. EDS of  $LiSc_2SbO_6:0.02Cr^{3+}$

Table S2 ICP results of LSS:0.02Cr<sup>3+</sup>

| $m_0$ (g) | $V_0$ (ml) | element | $C_0$ (mg/L) | f   | $C_1$ (mg/L) | $C_x$ (mg/kg) | W (%)  | Atomic (%) |
|-----------|------------|---------|--------------|-----|--------------|---------------|--------|------------|
| 0.0436    | 25         | Li      | 1.626        | 20  | 32.526       | 18650.142     | 1.84%  | 22.9%      |
| 0.0436    | 25         | Sc      | 4.239        | 100 | 423.886      | 243053.822    | 24.18% | 46.4%      |
| 0.0436    | 25         | Cr      | 1.849        | 10  | 18.487       | 10600.174     | 1.06%  | 1.7%       |
| 0.0436    | 25         | Sb      | 6.844        | 100 | 684.405      | 392433.774    | 39.55% | 28%        |

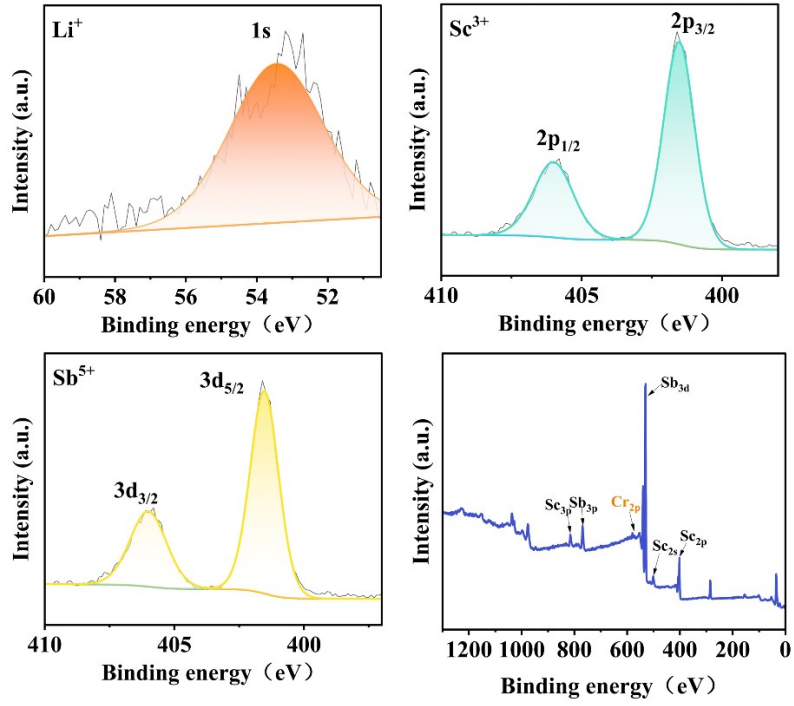

Fig.S3. XPS of  $LiSc_2SbO_6:0.02Cr^{3+}$

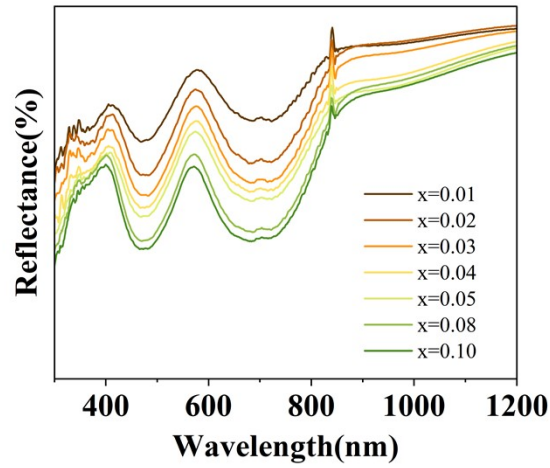

Fig.S4. Diffuse reflectance spectra of  $LiSc_2SbO_6:xCr^{3+}$  ( $x = 0.01 - 0.10$ )

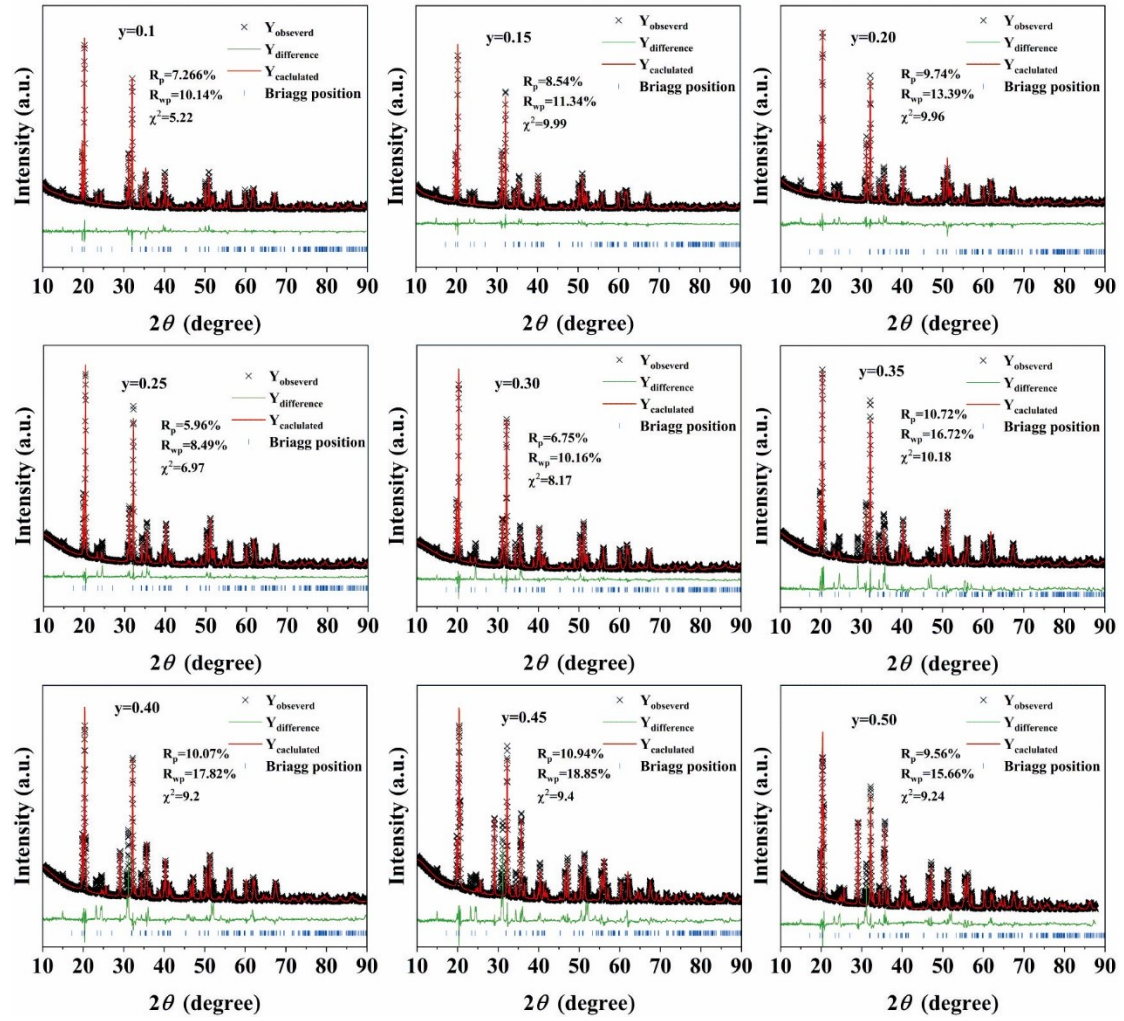

Fig.S5. XRD refinement of  $LMSS:Cr^{3+}$  ( $y = 0.10 - 0.50$ )

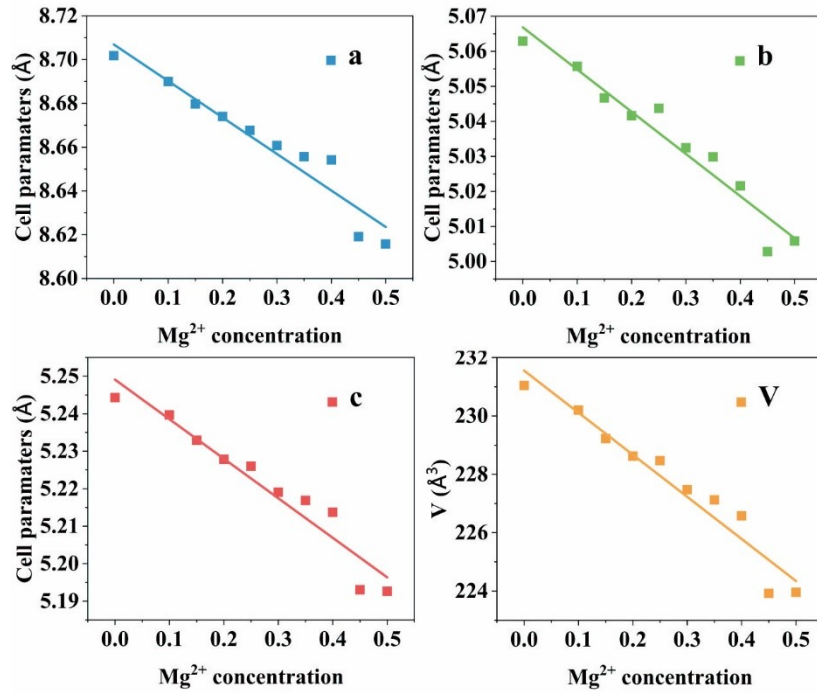

**Fig.S6.** The lattice parameters of  $LiSc_2SbO_6:0.02Cr^{3+}, 0.05Yb^{3+}$  as a function of the doping concentration of  $Mg^{2+}$ .

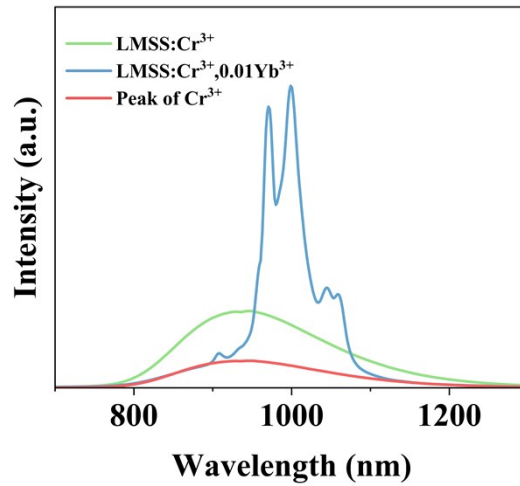

**Fig.S7.** PL spectra of LMSS:Cr<sup>3+</sup> and LMSS:Cr<sup>3+</sup>, 0.01Yb<sup>3+</sup>

**Table.S3.** ET efficiency of LMSS:Cr<sup>3+</sup>,zYb<sup>3+</sup> (z=0.01-0.13)

| Yb <sup>3+</sup> concentration | Cr <sup>3+</sup> integral area in LMSS:Cr <sup>3+</sup> ,Yb <sup>3+</sup> | Cr <sup>3+</sup> integral area in LMSS: Cr <sup>3+</sup> | ET (%) |
|--------------------------------|---------------------------------------------------------------------------|----------------------------------------------------------|--------|
| 0.01                           | 1125.95                                                                   | 3781.55                                                  | 70.23% |
| 0.03                           | 701.151                                                                   | 3781.55                                                  | 81.46% |
| 0.05                           | 664.141                                                                   | 3781.55                                                  | 82.44% |
| 0.07                           | 599.387                                                                   | 3781.55                                                  | 84.15% |
| 0.09                           | 512.476                                                                   | 3781.55                                                  | 86.45% |
| 0.11                           | 462.509                                                                   | 3781.55                                                  | 87.73% |
| 0.12                           | 439.384                                                                   | 3781.55                                                  | 88.38% |
| 0.13                           | 409.069                                                                   | 3781.55                                                  | 89.18% |

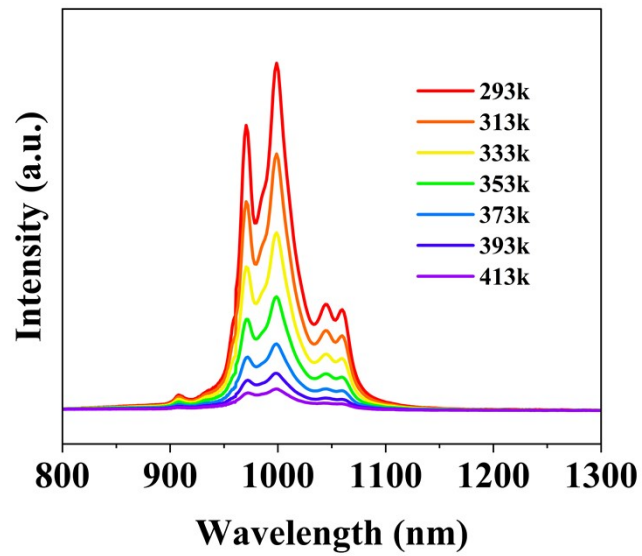

**Fig.S8.** Temperature-dependent PL spectra of LMSS:0.02Cr<sup>3+</sup>,0.05Yb<sup>3+</sup>
